# Supplementary material
Source: Springer Nature journal article supplement (https://www.springermedizin.de/resource/supplementary/13075_2011_3189_MOESM2_ESM.pdf/9693954)
Supplement: MOESM2 [file 9693954]

# SENSORY ORGANIZATION TEST (SOT) SIX CONDITIONS

| CONDITION |                                                                                     |                         | SENSORY SYSTEMS                                                                                                                                                                |
|-----------|-------------------------------------------------------------------------------------|-------------------------|--------------------------------------------------------------------------------------------------------------------------------------------------------------------------------|
| 1.        |    | Normal Vision           |                                                                                             |
|           |                                                                                     | Fixed Support           | <br>     |
| 2.        |    | Absent Vision           |                                                                                             |
|           |                                                                                     | Fixed Support           |                                                                                             |
| 3.        |   | Sway-Referenced Vision  |                                                                                             |
|           |                                                                                     | Fixed Support           | <br>    |
| 4.        |  | Normal Vision           |                                                                                           |
|           |                                                                                     | Sway-Referenced Support | <br> |
| 5.        |  | Absent Vision           |                                                                                           |
|           |                                                                                     | Sway-Referenced Support |                                                                                           |
| 6.        |  | Sway-Referenced Vision  |                                                                                           |
|           |                                                                                     | Sway-Referenced Support | <br> |

|                                                                                     |                     |                                                                                     |                         |                                                                                       |                            |
|-------------------------------------------------------------------------------------|---------------------|-------------------------------------------------------------------------------------|-------------------------|---------------------------------------------------------------------------------------|----------------------------|
|  | <b>VISUAL INPUT</b> |  | <b>VESTIBULAR INPUT</b> |  | <b>SOMATOSENSORY INPUT</b> |
|-------------------------------------------------------------------------------------|---------------------|-------------------------------------------------------------------------------------|-------------------------|---------------------------------------------------------------------------------------|----------------------------|

**SWAY REFERENCED INPUT:** In the test conditions indicating sway referenced input, either the support surface, the visual surround, or both will move in response to the patient's measured sway. This is not a perturbation or a random movement. The movement follows the patient's sway, providing inaccurate sensory feedback information to the patient.
